# Supplementary material
Source: PubMed Central journal article supplement (PMC3730767)

*Ren1cCreER x Rs-tdTomato-R Mice*

**PAX2 (red) Red Fluorescent Protein**

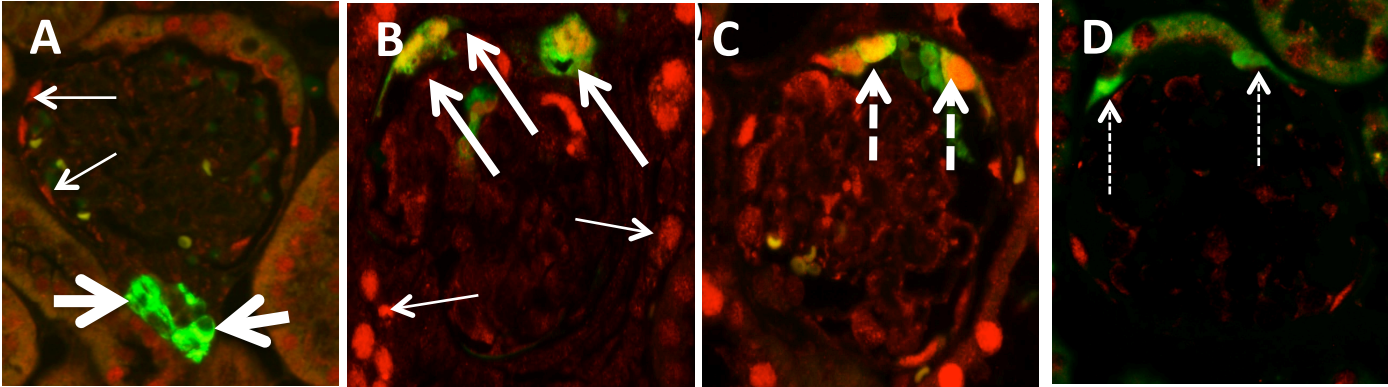

**Claudin-1 (red) Red Fluorescent Protein (green)**

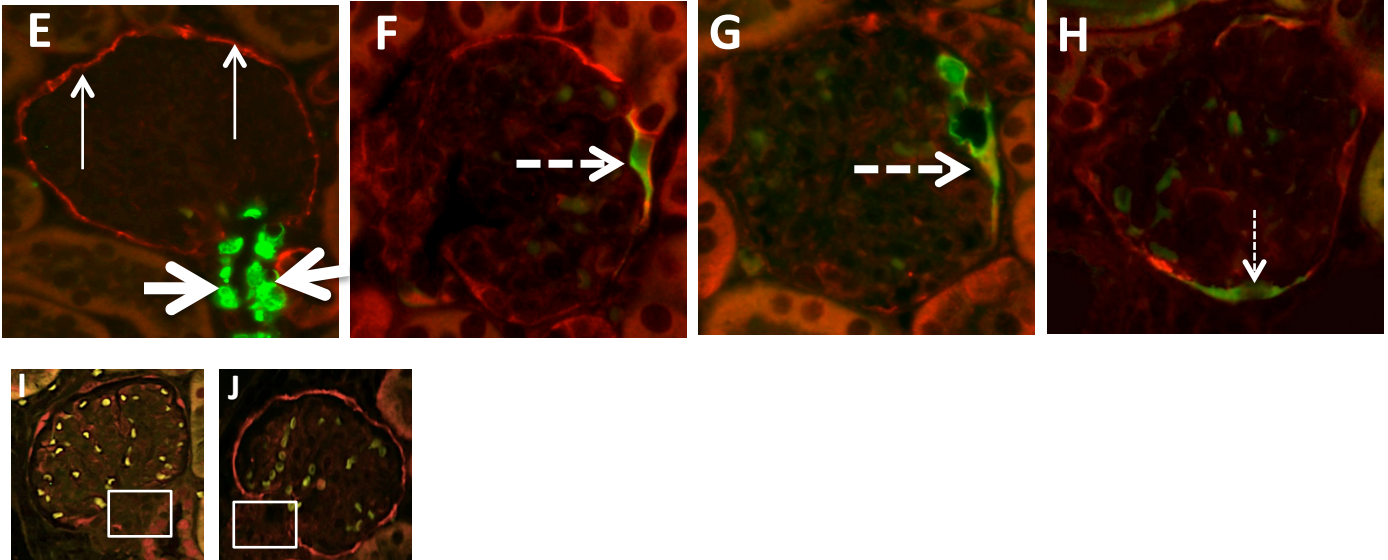

Supplement: mmc7.pdf [file mmc7.pdf]
