# Supplementary material
Source: PubMed Central journal article supplement (PMC3730767)

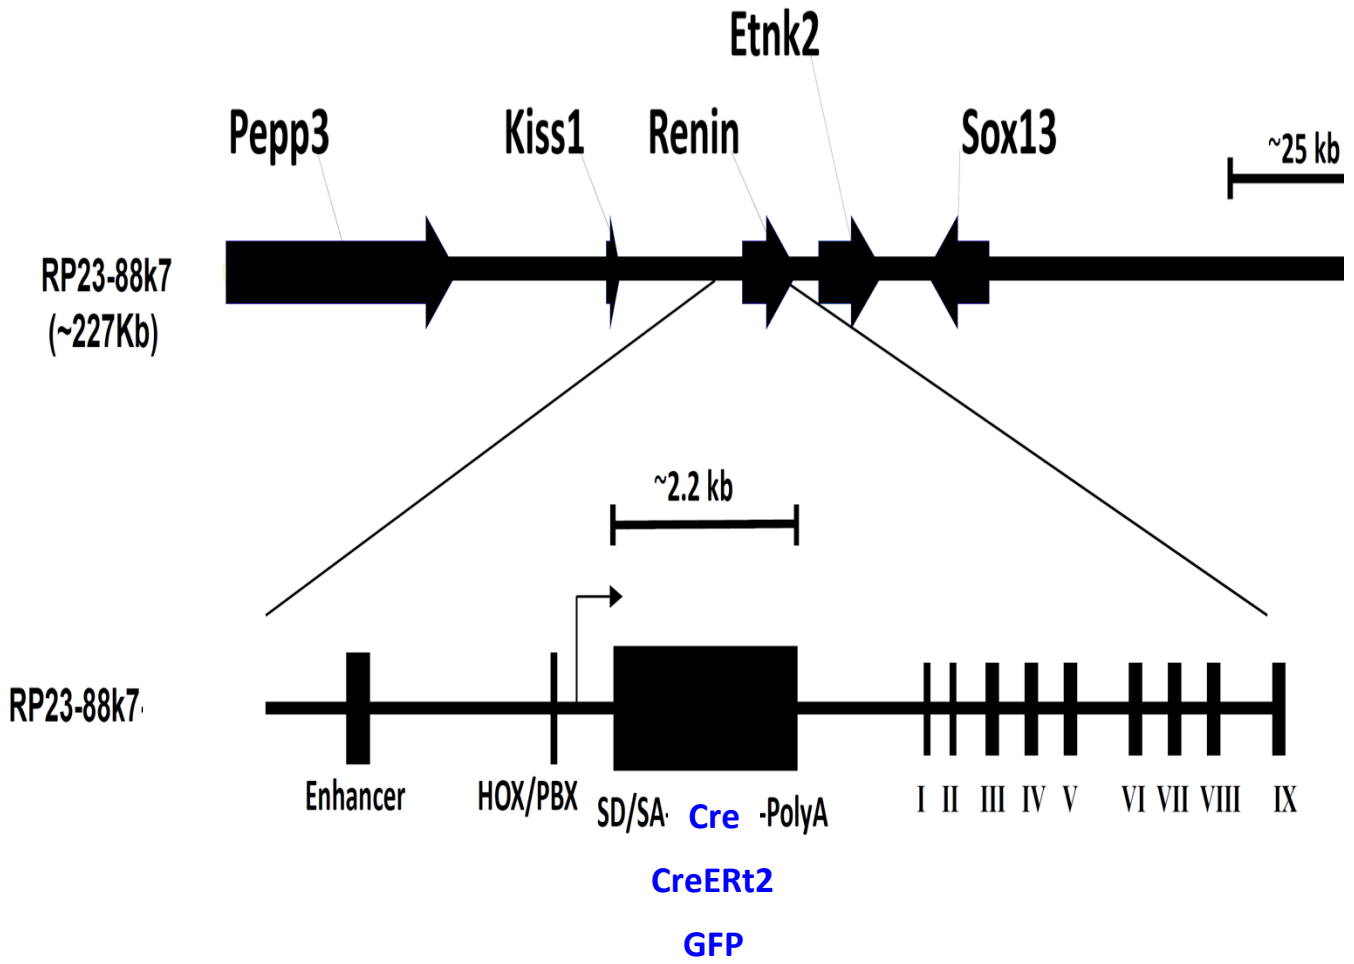

Supplement: mmc1.pdf [file mmc1.pdf]

*Ren1dCre x Z/EG Mice*

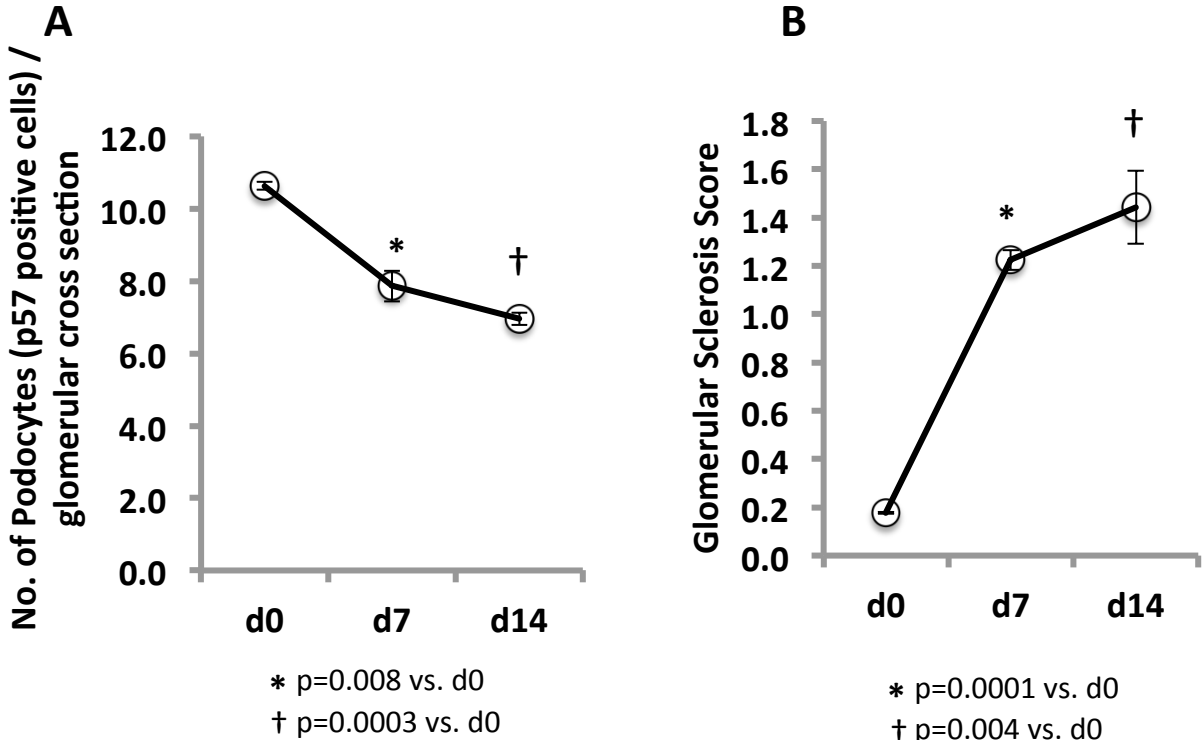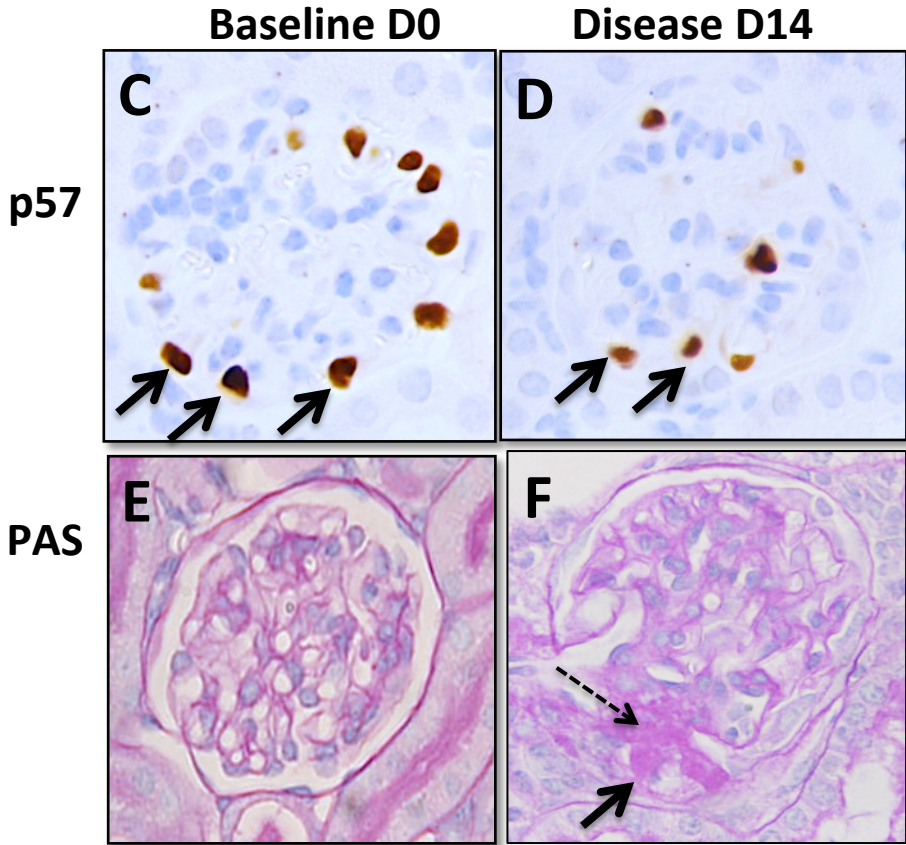

Supplement: mmc10.pdf [file mmc10.pdf]

*Ren1dCre x Z/EG Mice*

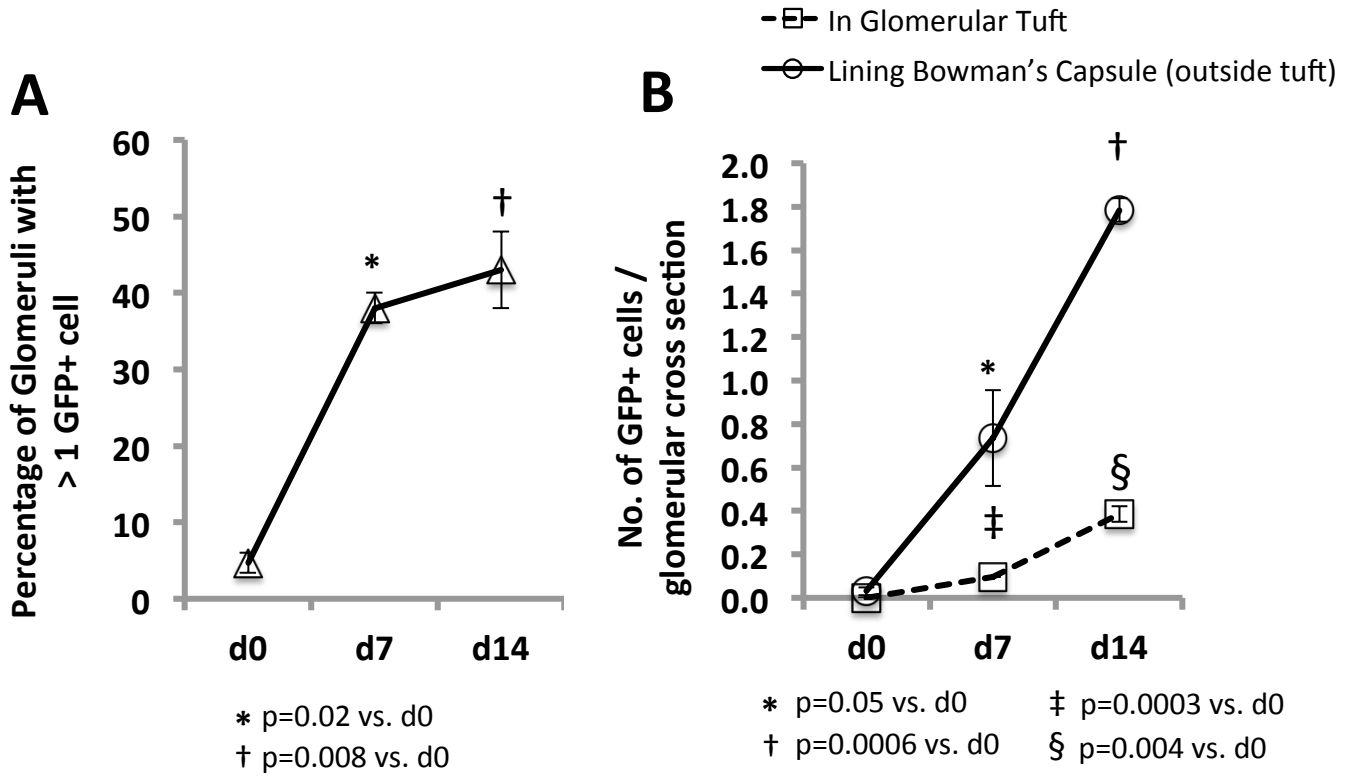

*Ren1dCre x Z/EG Mice*

Sheep IgG (green)

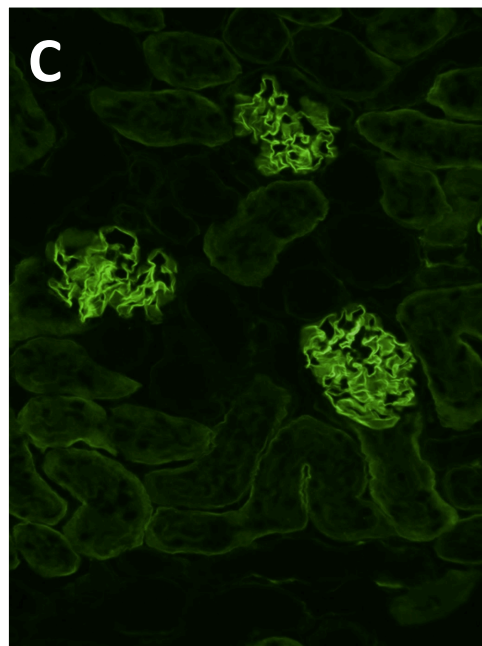

Supplement: mmc11.pdf [file mmc11.pdf]

*RenGFP Reporter Mice*

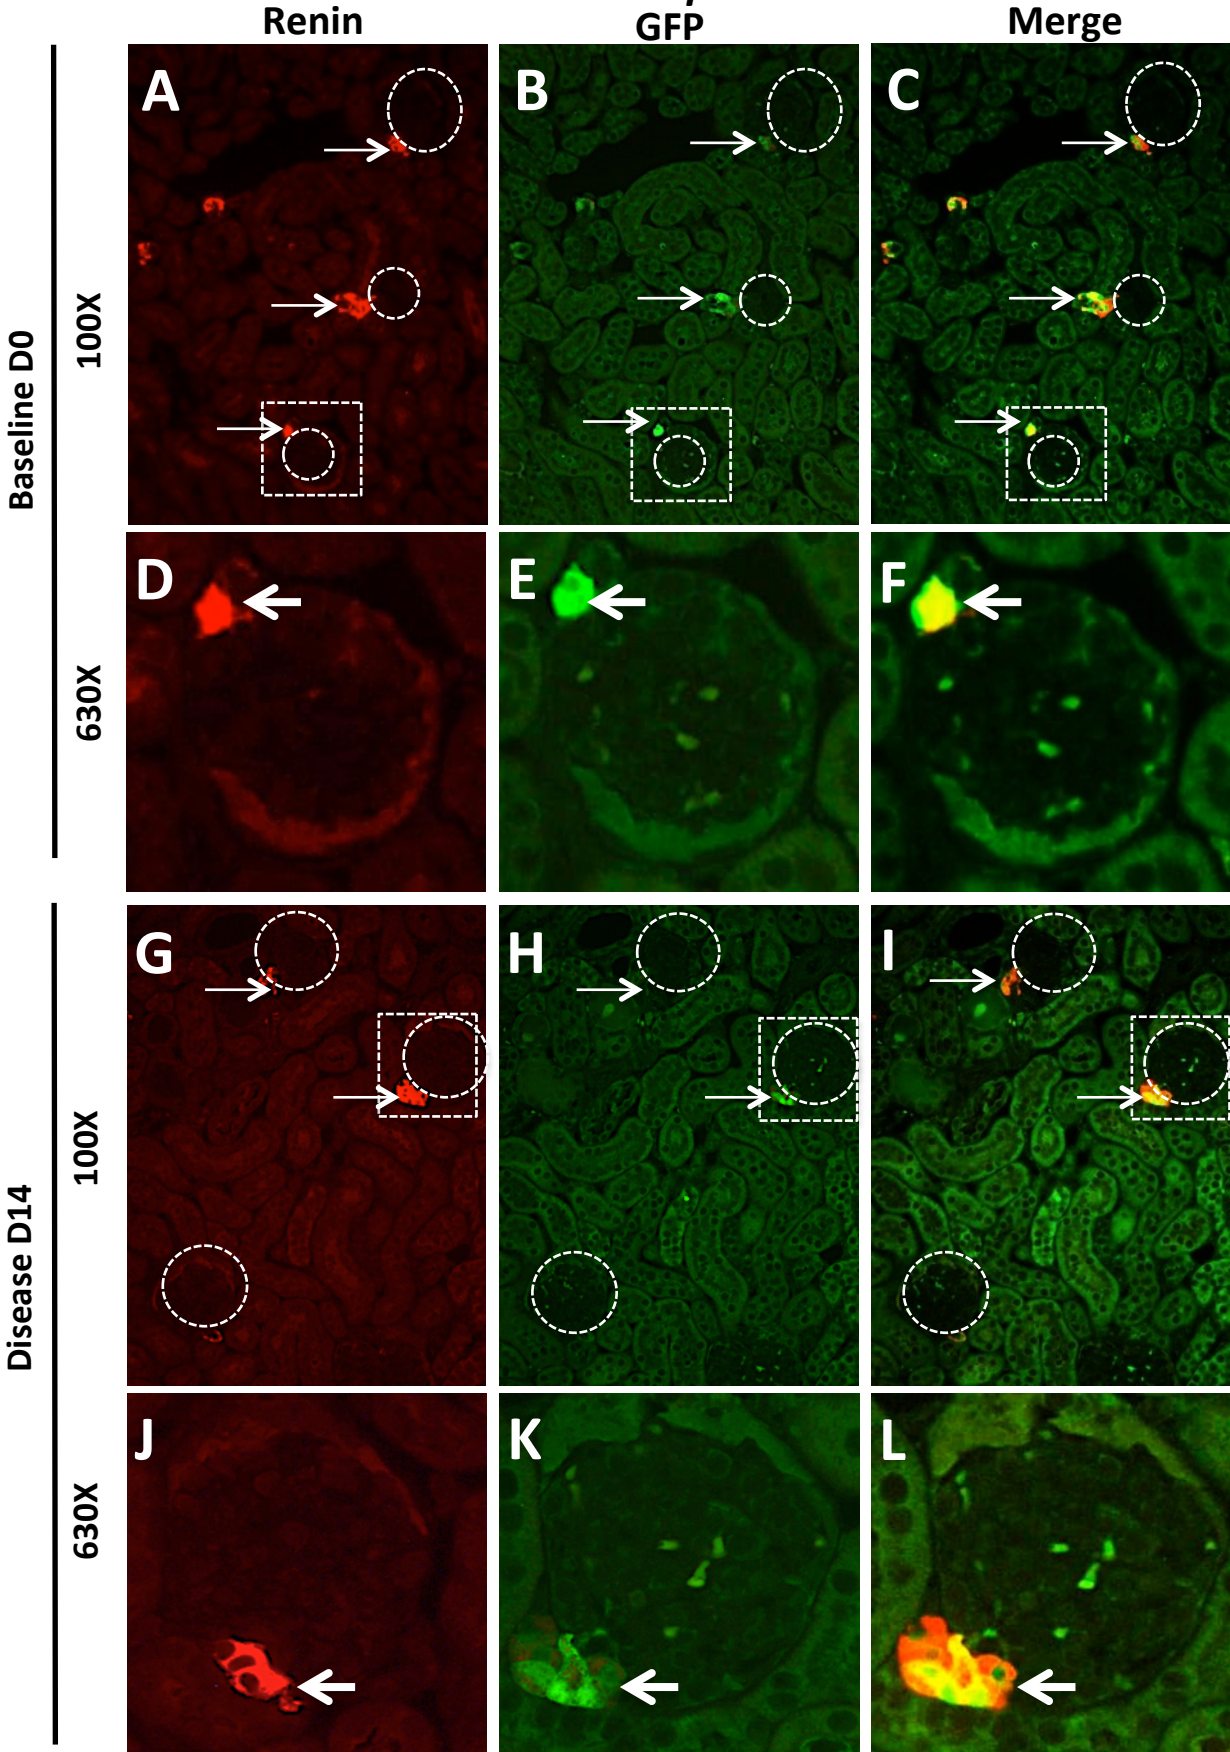

Supplement: mmc12.pdf [file mmc12.pdf]

*Ren1cCreER x Rs-ZsGreen-R*

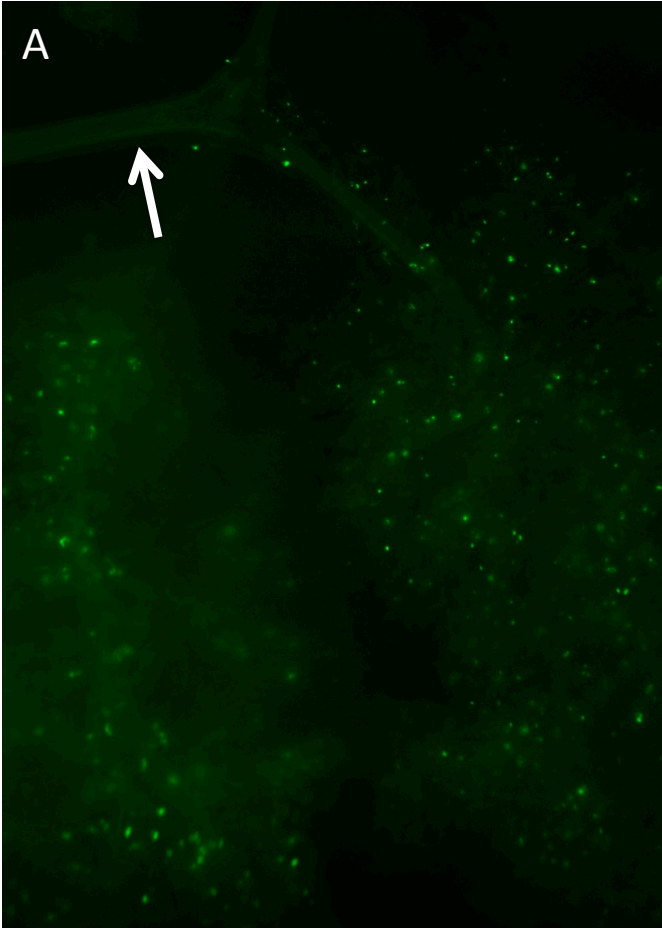

*Ren1cCre x Rs-ZsGreen-R*

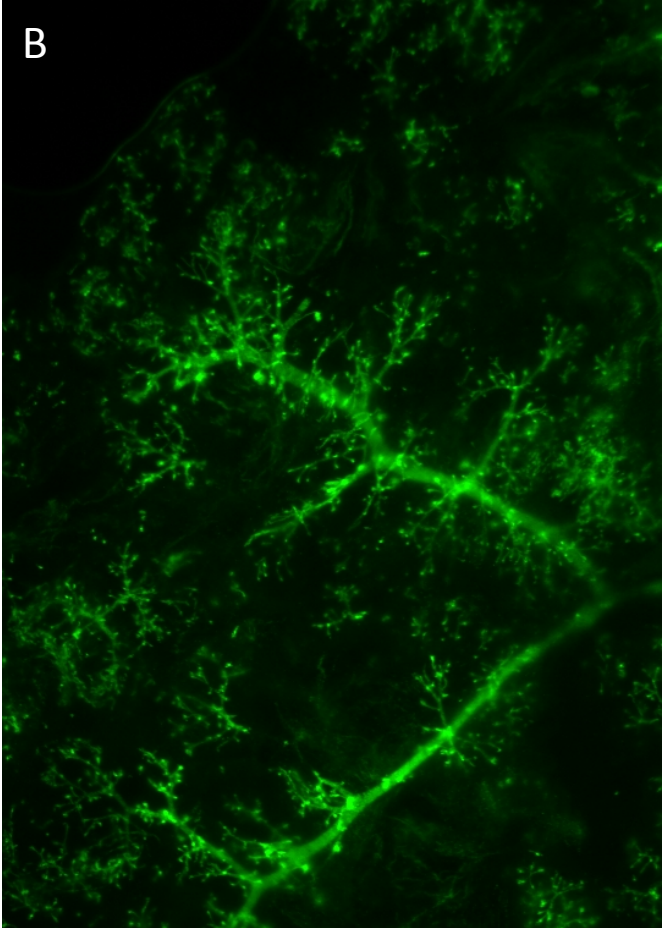

Supplement: mmc2.pdf [file mmc2.pdf]

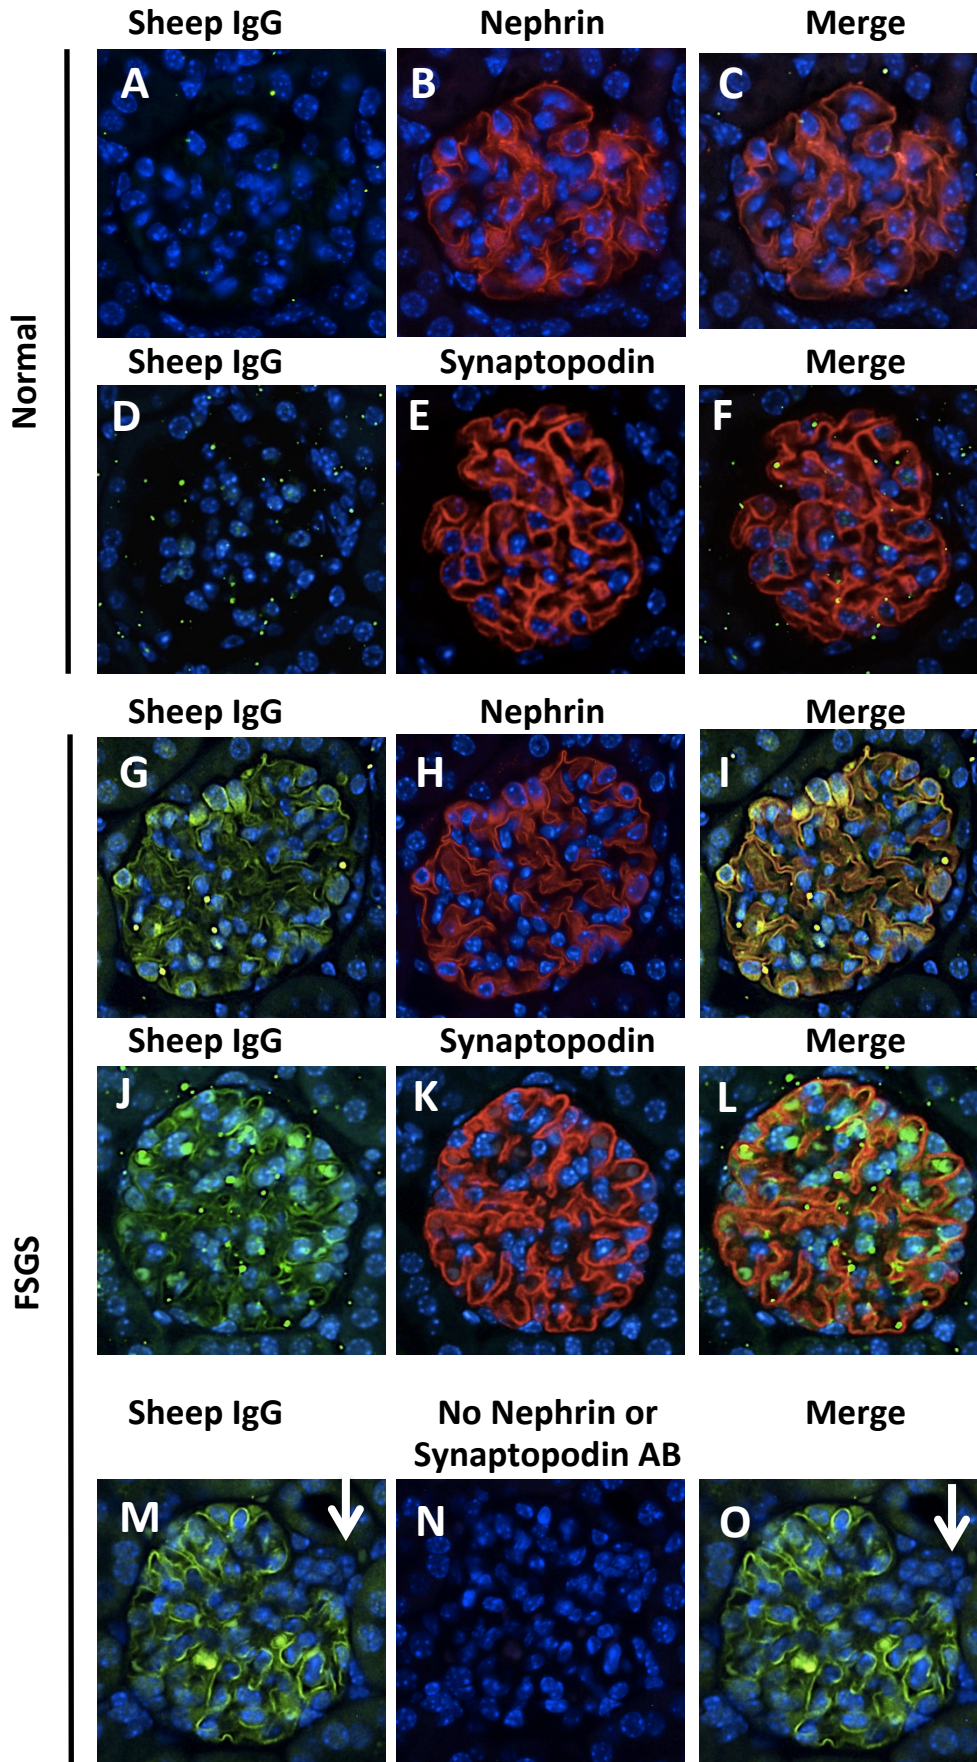

Supplement: mmc3.pdf [file mmc3.pdf]

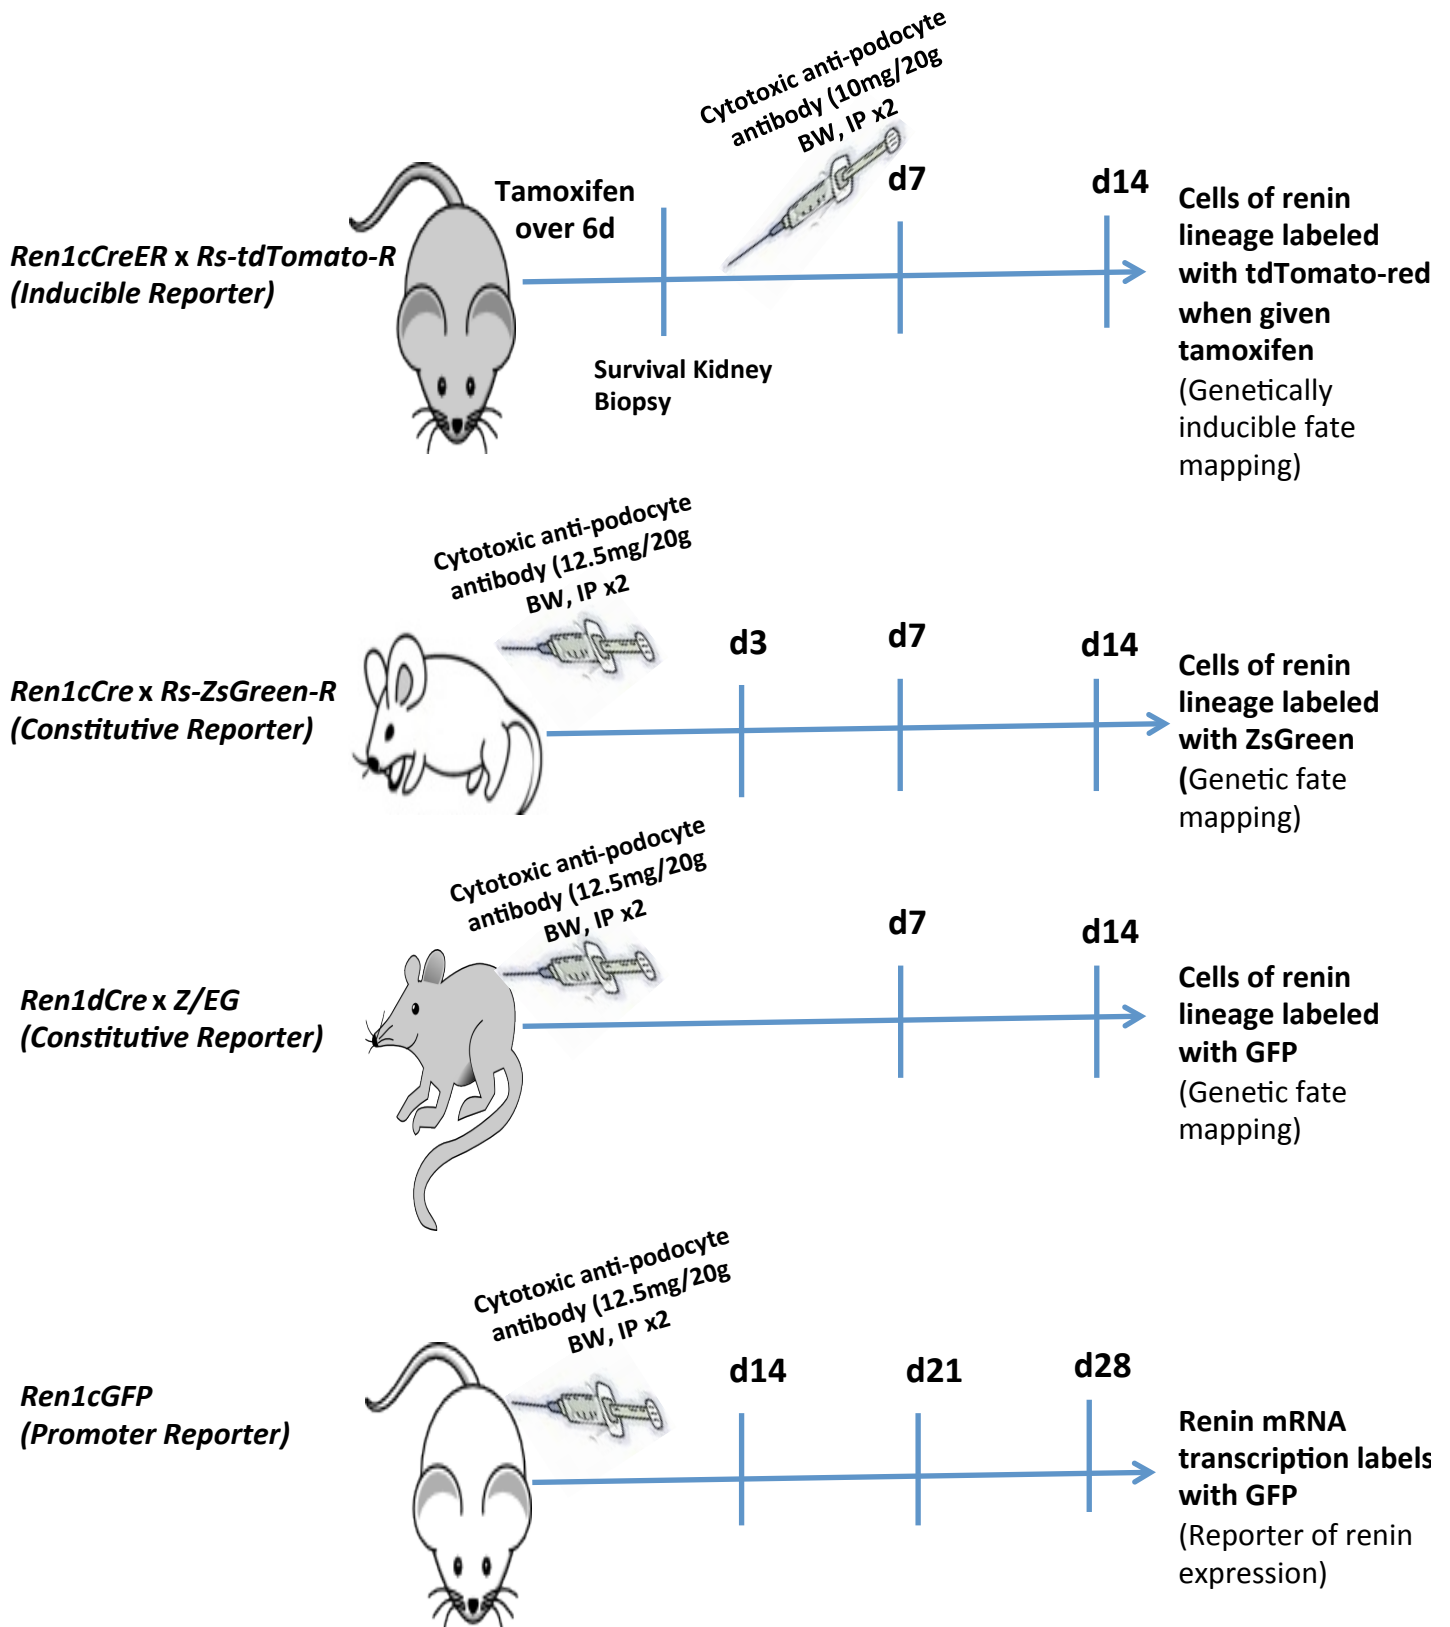

Supplement: mmc4.pdf [file mmc4.pdf]

Supplemental Figure 5

*Ren1cCreER x Rs-tdTomato-R Mice*

Sheep IgG (green)

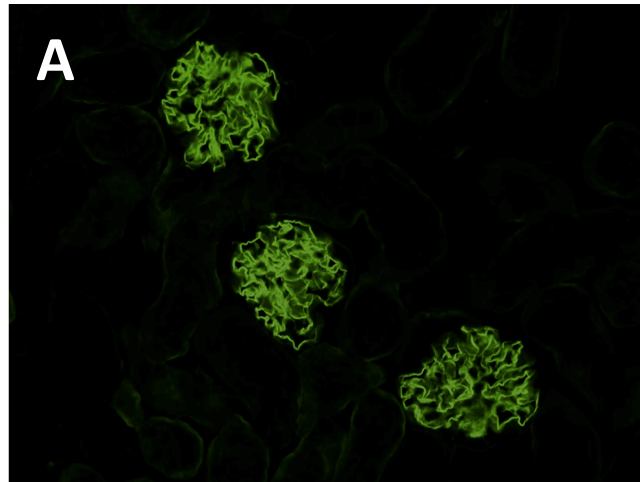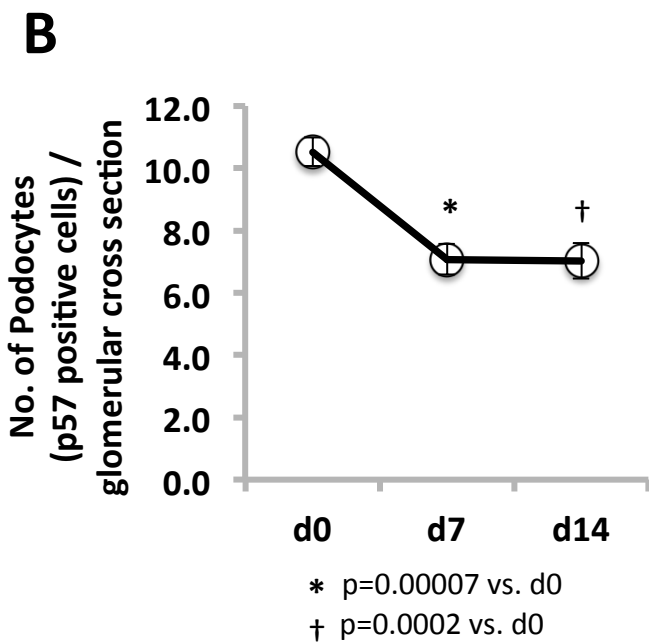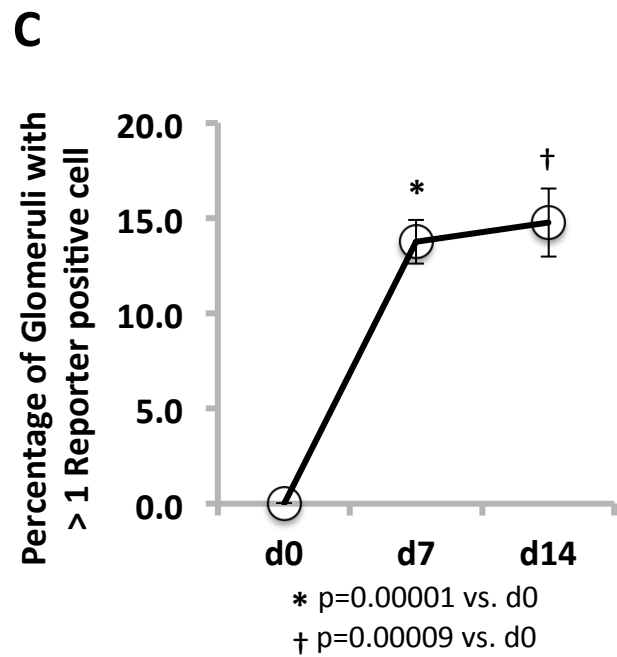

Supplement: mmc5.pdf [file mmc5.pdf]

*Ren1cCre x Rs-ZsGreen-R Mice*

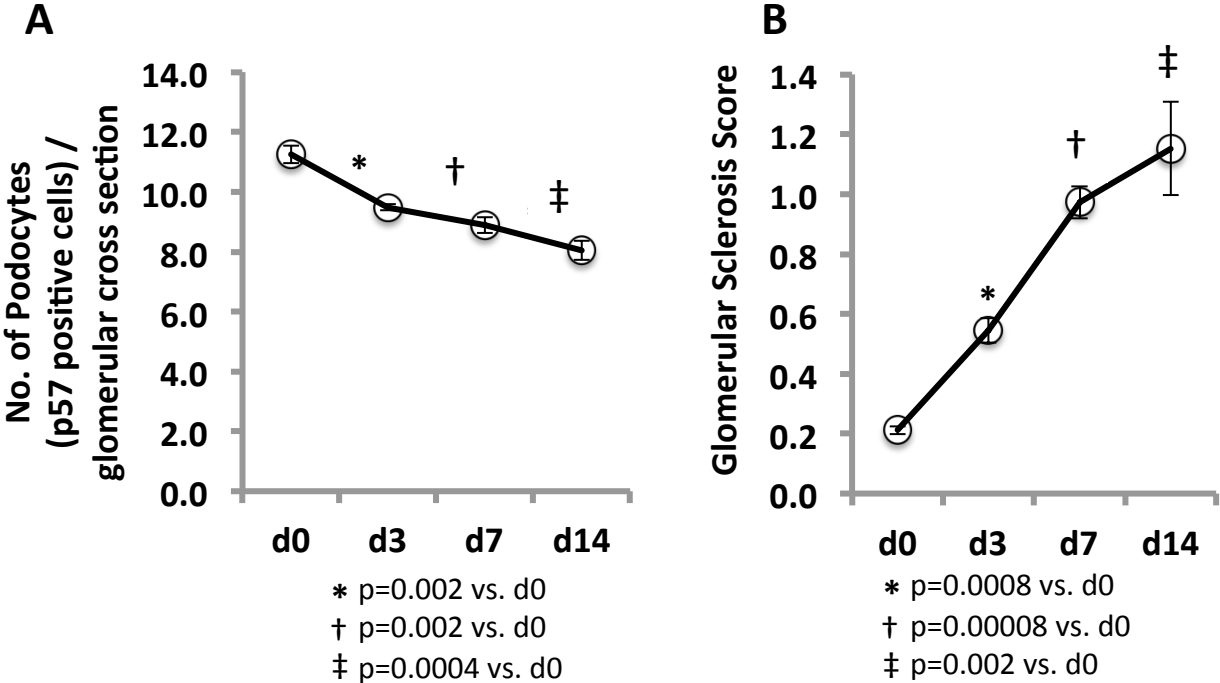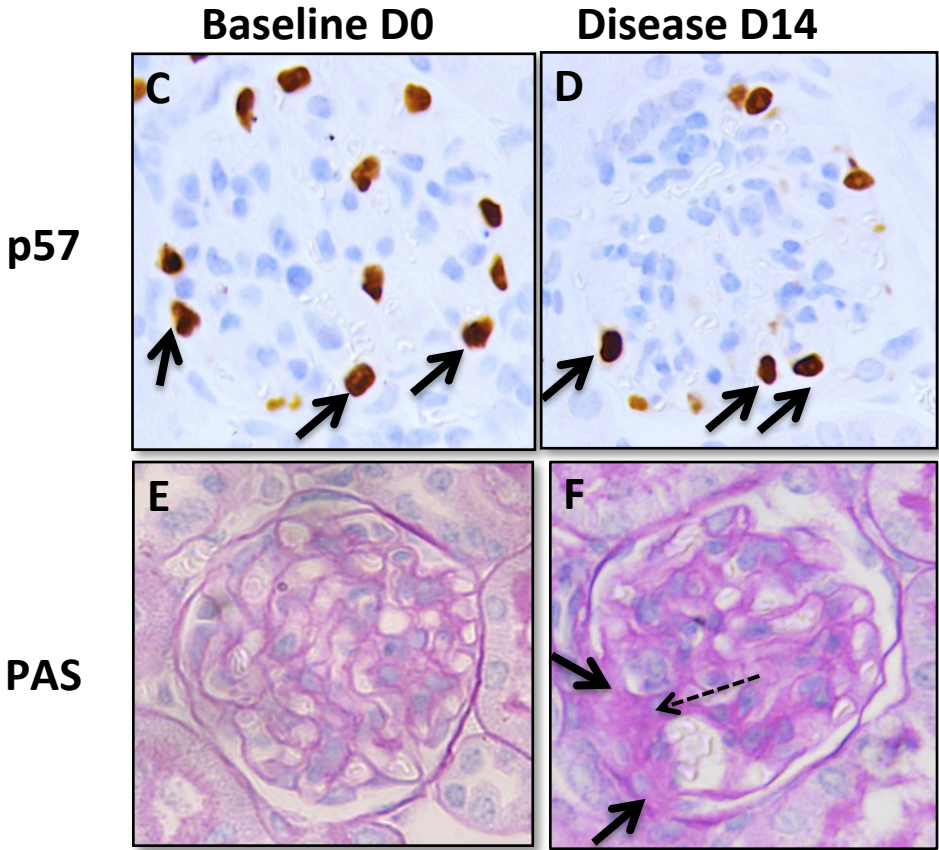

Supplement: mmc8.pdf [file mmc8.pdf]

*Ren1cCre x Rs-ZsGreen-R Mice*

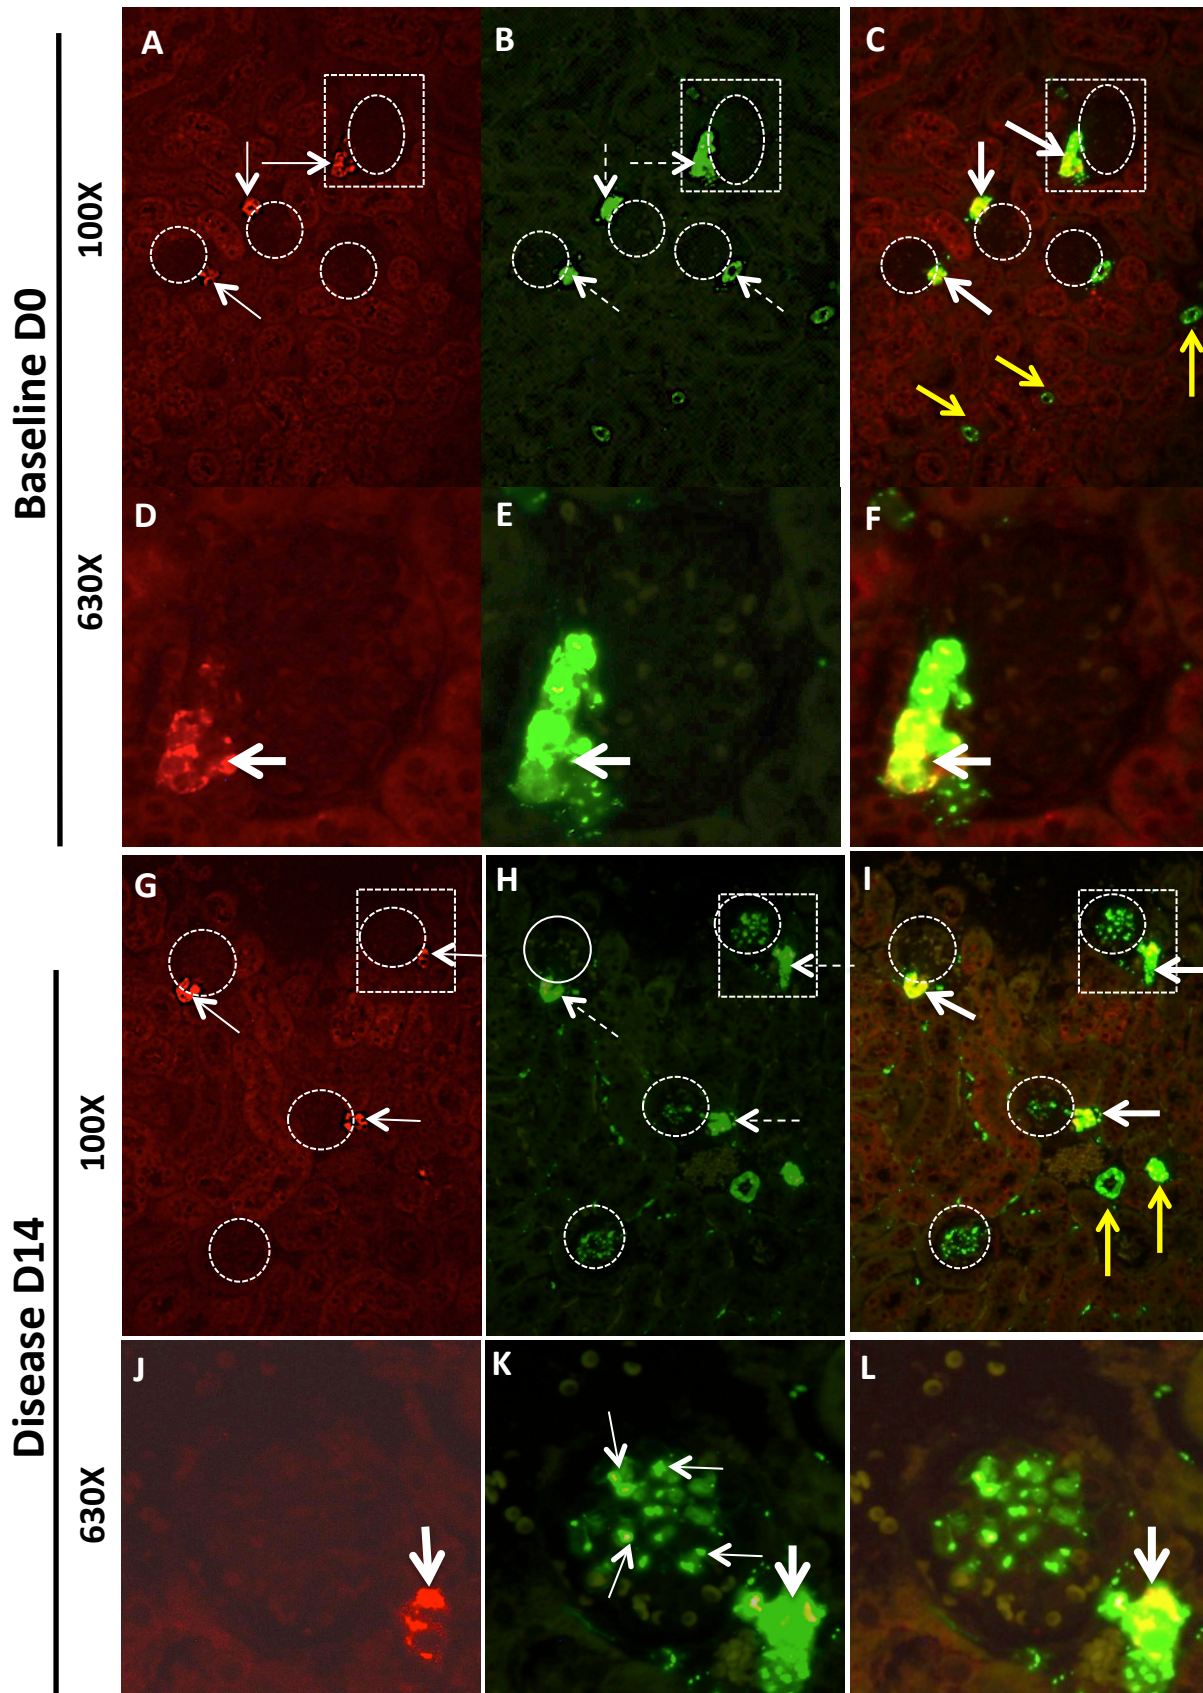

Supplement: mmc9.pdf [file mmc9.pdf]
